# Supplementary material
Source: PubMed Central journal article supplement (PMC3174333)
Supplement: NIHMS319701-supplement-1.pdf [file NIHMS319701-supplement-1.pdf]

# **ONLINE SUPPLEMENT**

## **RACK1 REGULATES CELL PROLIFERATION BY MODULATING CALCIUM SIGNALING**

**Dongmei Cheng, Xiao Zhu, Federica Barchiesi, Delbert G. Gillespie,  
Raghvendra K. Dubey, and Edwin K. Jackson**

Departments of Pharmacology and Chemical Biology (DC, XZ, EKJ)  
University of Pittsburgh School of Medicine, Pittsburgh, Pennsylvania 15219  
and

Department of Obstetrics and Gynecology (FB, RKD)  
University Hospital Zurich, Zurich, Switzerland  
Running title: **RACK1 Regulates Cell Proliferation**

### **Address for Correspondence:**

Dr. Edwin K. Jackson  
Department of Pharmacology and Chemical Biology  
100 Technology Drive, Room 514  
University of Pittsburgh School of Medicine  
Pittsburgh, PA 15219  
Tel: 412-648-1505  
Fax: 412-624-7050  
E-mail: edj@pitt.edu

**A**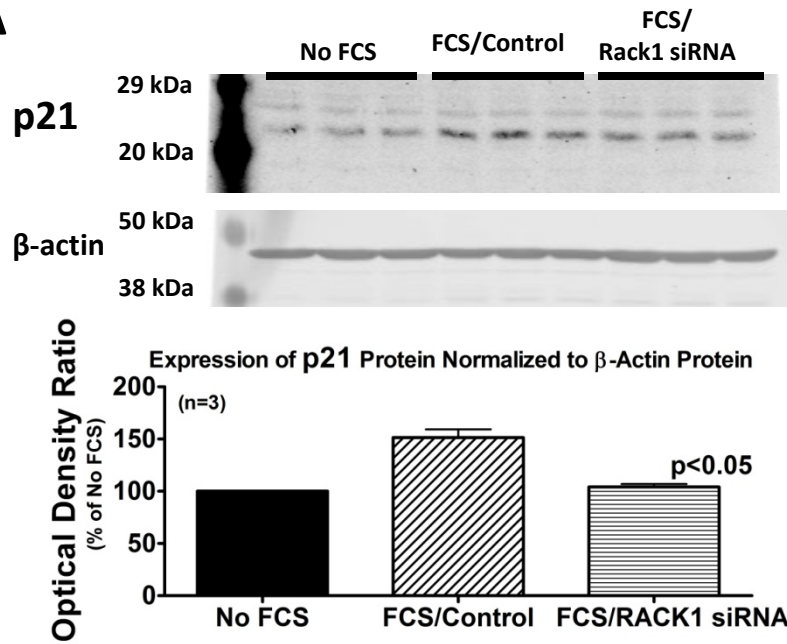**B**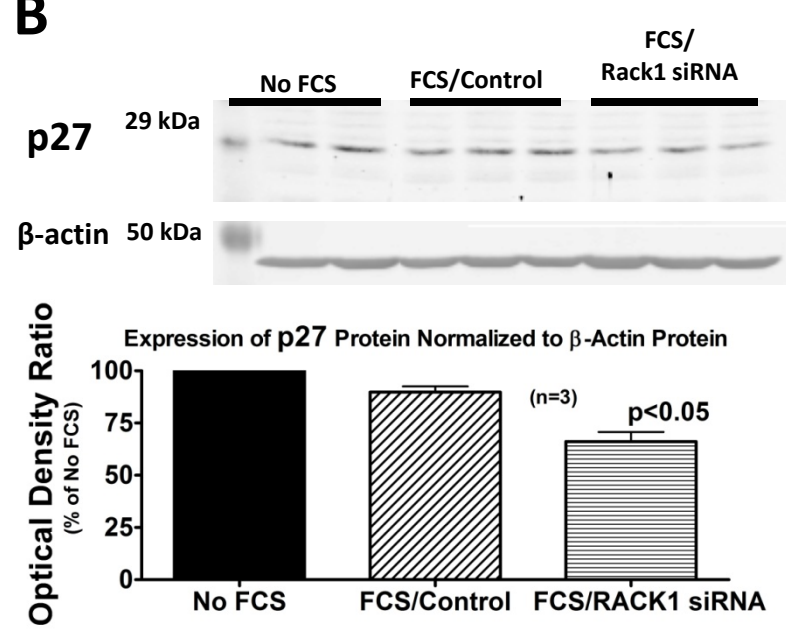**C**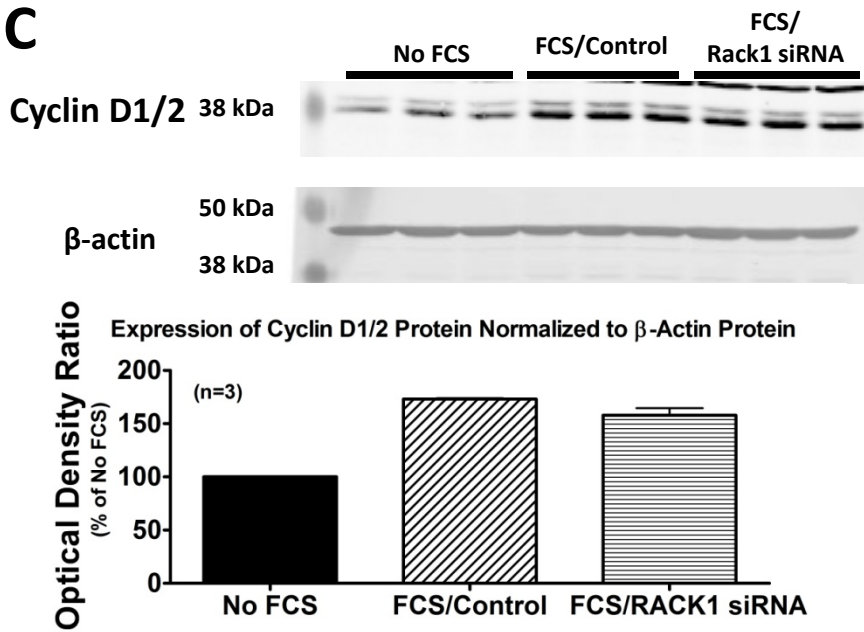**D**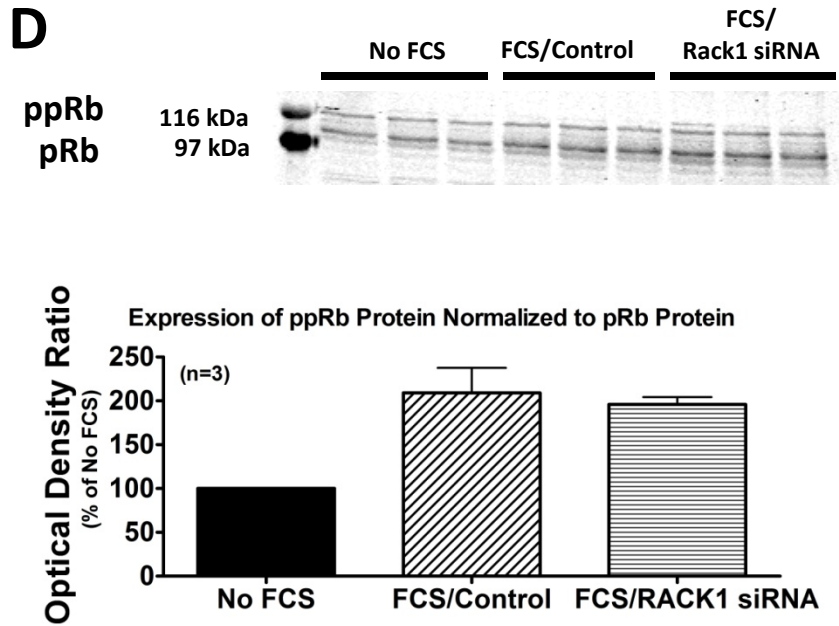**Figure S1**

**Figure S1.** Western blots in panels A-D illustrate effects of RACK1 siRNA (FCS/RACK1 siRNA) versus negative control siRNA (FCS/Control) on the expression in preglomerular vascular smooth muscle cells of p21<sup>Cip1/Waf1</sup> (p21; panel A), p27<sup>Kip1</sup> (p27; panel B), cyclin D1/2 (panel C) and hyperphosphorylated retinoblastoma protein (ppRb; panel D) in the presence of 2.5% fetal calf serum (FCS) in the medium. The protein expression of p21, p27 and cyclin D1/2 was normalized to  $\beta$ -actin protein expression by calculating the optical density ratio (optical density of p21, p27 or cyclin D1/2 band divided by optical density of  $\beta$ -actin band). The protein expression of ppRb was normalized to pRb protein expression by calculating the optical density ratio (optical density of ppRb band divided by optical density of pRb band). The optical density ratio for each protein was expressed as a % of the average optical density ratio for cells in the absence of FCS (No FCS). Values represent means  $\pm$  SEM, and p-values (unpaired Student's t-test) compare FCS/RACK1 siRNA to FCS/Control.

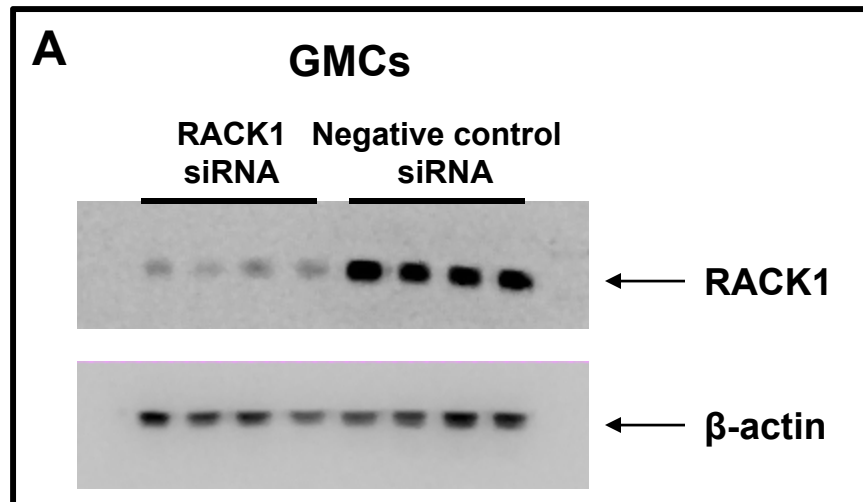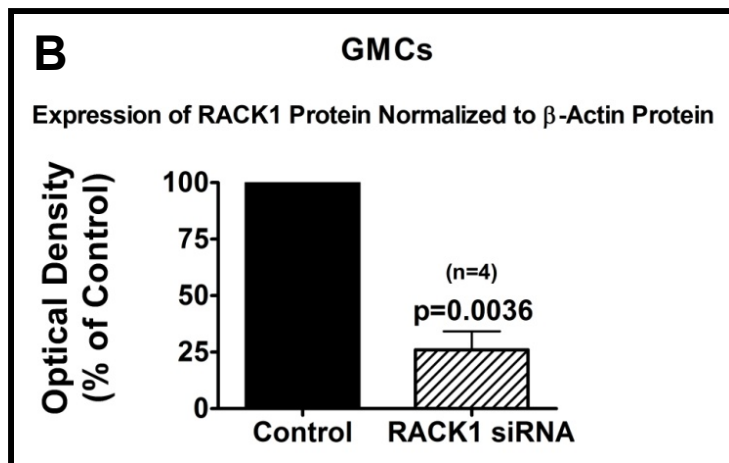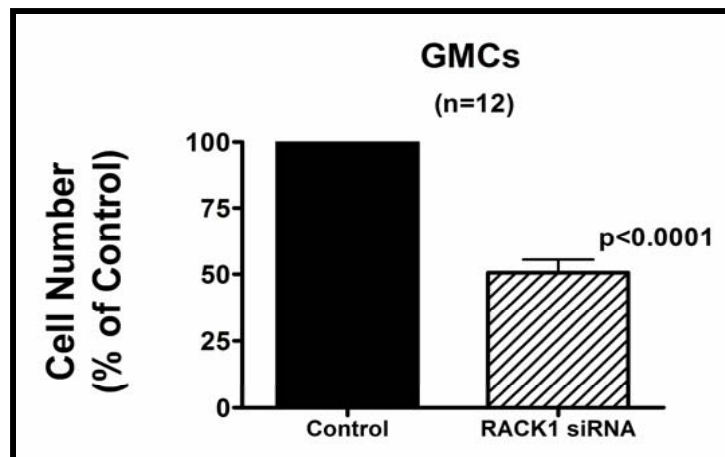

**Figure S2**

**Figure S2.** Panel A shows Western blots demonstrating the effects of RACK1 siRNA versus negative control siRNA on RACK1 protein expression in glomerular mesangial cells (GMCs). For both negative control siRNA-treated cells (Control) and RACK1 siRNA-treated cells (RACK1 siRNA) the RACK1 protein expression was normalized to  $\beta$ -actin protein expression by calculating the optical density ratio (optical density of RACK1 band divided by optical density of  $\beta$ -actin band). In panel B, the optical density ratio for RACK1 siRNA cells was expressed as a % of the average optical density for the Control cells. Panel C depicts effects of RACK1 siRNA versus negative control siRNA (Control) on cell number in GMCs under high serum (2.5%) conditions. Cell number for RACK1 siRNA cells was expressed as a % of the average cell number for the Control cells. The cell count for control GMCs was 396,875. Values represent means  $\pm$  SEM, and p-values are from unpaired Student's t-test.
